# Supplementary material for: Spectrum Analysis of Inherited Metabolic Disorders for Expanded Newborn Screening in a Central Chinese Population
Source: Front Genet. 2022 Jan 12;12:763222. doi: 10.3389/fgene.2021.763222 (PMC8790479; doi:10.3389/fgene.2021.763222)
Supplement: Supplementary file 3 [file DataSheet2.xlsx]

## Sheet: Screening indicators
No.	Screening indicators	Abbreviations	Cut-off values	No.	Ratios	Cut-off values
			(μmol/L)
1	Free carnitine	C0	9-50	44	ARG/PHE	0.02-0.7
2	Acetylcarnitine	C2	3-48	46	MET/PHE	0.1-0.6
3	Propionylcarnitine	C3	0.35-4.0	47	MET/CIT	0.51-4
4	Malonylcarnitine+	C3DC+C4OH	0.03-0.4	48	ORN/CIT	2.5-22
	3-hydroxy butyrylcarnitine
5	Butyrylcarnitine	C4	0.1-0.5	49	ARG/ORN	0.01-0.4
6	Methylmalonylcarnitine+	C4DC+C5OH	0.07-0.4	50	ALA/CIT	9.5-65
	3-hydroxy isovalerylcarnitine
7	Isovalerylcarnitine	C5	0.03-0.3	51	CIT/PHE	0.1-0.7
8	Tiglylcarnitine	C5:1	0-0.03	52	PHE/TYR	0.2-1.4
9	Glutarylcarnitine+3-hydroxy hexanoylcarnitine	C5DC+C6OH	0.03-0.25	53	SA/PHE	0-0.04
10	Hexanoylcarnitine	C6	0.01-0.11	54	TYR/PHE	0.6-7
11	Adipylcarnitine	C6DC	0.03-0.27	55	(LEU+ILE+PRO-OH)/PHE	1.15-5.2
12	Octanoylcarnitine	C8	0.02-0.2	56	(LEU+ILE+PRO-OH)/TYR	0.5-4.2
13	Octenoylcarnitine	C8:1	0.03-0.45	57	C0/(C16+C18)	1.8-30
14	Decenoylcarnitine	C10:1	0.02-0.17	58	C3/C0	0.01-0.2
15	Decanoylcarnitine	C10	0.02-0.3	59	C3/C2	0.03-0.2
16	Decadienoylcarnitine	C10:2	0-0.15	60	C3/MET	0.02-0.3
17	Dodecanoylcarnitine	C12	0.02-0.35	61	C4/C2	0-0.04
18	Dodecenoylcarnitine	C12:1	0.01-0.37	62	C4/C3	0.04-0.45
19	Myristoylcarnitine	C14	0.04-0.45	63	C5/C0	0-0.02
20	Myristoleylcarnitine	C14:1	0.02-0.35	64	C8/C2	0-0.01
21	Tetradecadienoylcarnitine	C14:2	0-0.05	65	C8/C10	0.3-1.5
22	3-hydroxy myristoylcarnitine	C14OH	0-0.05	66	C14:1/C2	0-0.02
23	Palmitoylcarnitine	C16	0.5-6.86	67	C14:1/C16	0.01-0.1
24	Hexadecenoylcarnitine	C16:1	0.02-0.5	68	C16OH/C16	0-0.02
25	3-hydroxy palmitoylcarnitine	C16OH	0-0.06	69	(C16+C18:1)/C2	0.12-0.55
26	3-hydroxy palmitoleylcarnitine	C16:1OH	0.01-0.08	70	(C3DC+C4OH)/C10	0.35-4.33
27	Octadecanoylcarnitine	C18	0.24-2	71	(C5DC+C6OH)/	0.3-2
					(C3DC+C4OH)
28	Octadecenoylcarnitine	C18:1	0.38-3	72	(C5DC+C6OH)/	0.15-1.6
					(C4DC+C5OH)
29	Linoleylcarnitine	C18:2	0.05-0.6	73	(C0+C2+C3+C16+C18:1+C18)/	1.3-12
					CIT
30	3-hydroxy octadecanoylcarnitine	C18OH	0-0.03	74	(C4DC+C5OH)/C8	44208
31	3-hydroxy octadecenoylcarnitine	C18:1OH	0-0.06
32	Alanine	ALA	125-650
33	Arginine	ARG	1-45
34	Citrulline	CIT	5.5-26
35	Glycine	GLY	190-1000
36	Leucine+isoleucine+	LEU+ILE+	50-260
	hydroxyproline	PRO-OH
37	Methionine	MET	6.5-40
38	Ornithine	ORN	30-250
39	Phenylalanine	PHE	23-100
40	Proline	PRO	75-420
41	Succinylacetone	SA	0-1.6
42	Tyrosine	TYR	30-250
43	Valine	VAL	40-230

## Sheet: Positive rules
Disorders (OMIM code)	Positive rules 1	Positive rules 2	Positive rules 3	Positive rules 4	Positive rules 5
Phenylalanine hydroxylase deficiency (#261,600), Tetrahydrobiopterin deficiency (#233,910, #261,640, #612,716, #264,070, and #261,630)	PHE > 100 μmol/L, PHE/TYR >= 1.4	PHE > 120 μmol/L	PHE/TYR >= 2.4
Glutaric acidemia type Ⅰ (#231,670)	C5DC+C6OH > 0.25 μmol/L,	C5DC+C6OH > 0.3 μmol/L
	(C5DC+C6OH)/(C3DC+C4OH) >= 2,
	(C5DC+C6OH)/(C4DC+C5OH) > 1.6
Hyperornithinemia-hyperammonemia-homocitrullinuria syndrome (#238,970)	ORN > 196 μmol/L, ORN/CIT > 22	ORN > 350 μmol/L
Citrullinemia type Ⅰ (#215,700), Citrin deficiency (Citrullinemia (#605,814 and #603,471), Argininosuccinic aciduira (#207,900)	CIT > 26 μmol/L, ALA/CIT < 9.5	CIT > 65 μmol/L
Carbamoylphosphate synthetase I deficiency(#237,300), ornithine aminotransferase	CIT < 5.5 μmol/L, CIT/PHE < 0.1	CIT < 4.5 μmol/L
deficiency (#258,870), ornithine transcarbamylase deficiency (#311,250)
Tyrosinemia type I (#276,700)	SA > 1.1 μmol/L, SA/PHE >= 0.04	SA > 1.8 μmol/L
Homocystinuria (#236,200),	MET > 40 μmol/L, MET/PHE > 0.6	MET > 65 μmol/L
Hypermethioninemia (#250,850)
Maple syrup urine disease (#248,600)	LEU+ILE+PRO-OH > 260 μmol/L,	LEU+ILE+PRO-OH > 400 μmol/L
	(LEU+ILE+PRO-OH)/PHE > 5.2, VAL > 230 μmol/L
Tyrosinemia type Ⅱ (276,600), Tyrosinemia type Ⅲ (#276,710)	TYR > 250 μmol/L,	TYR > 400 μmol/L
	(LEU+ILE+PRO-OH)/TYR < 0.5,
	PHE/TYR < 0.2
Argininemia (#207,800)	ARG/PHE > 0.7, ARG/ORN>0.4, ARG>45	ARG > 65 μmol/L
Methylmalonic acidemia (#251,000, #277,400, #277,410, #251,100, #251,110, #277,380, #309,541, #613, 646, #614, 265 and #614, 857 ),	C3 > 4.5 μmol/L, C3/C2 > 0.2	C3 > 6.5 μmol/L	C3/C0 > 0.3	C3/C2 > 0.29	C3/MET > 0.4
propionic acidemia (#606,054)
Isovaleric acidemia (#243,500), 2-methylbutryl CoA dehydrogenase deficiency (#610,006)	C5 > 0.3 μmol/L, C5/C0 >= 0.02	C5>0.8 μmol/L
Holocarboxylase synthetase deficiency (#253, 270), 3-methylglutaconyl CoA hydratase deficiency (#250,950), 3-methylcrotonyl CoA carboxylase deficiency (#210,200 and #210,210), 3-hydroxy-3-methylglutaryl-CoA lyase deficiency (#246,450)	C4DC+C5OH > 0.4 μmol/L, (C4DC+C5OH)/C0 >= 0.03	C4DC+C5OH > 0.5 μmol/L
Multiple acyl-CoA dehydrogenase deficiency (#231,680)	C5 > 0.3 μmol/L, C4 > 0.5 μmol/L
Beta-ketothiolase deficiency (#203,750)	C5:1 >= 0.01 μmol/L, C4DC+C5OH > 0.4 μmol/L
Malonic acidemia (#248,360)	C3DC+C4OH > 0.4 μmol/L,	C3DC+C4OH > 0.8 μmol/L,
	(C3DC+C4OH)/C10 > 4.33
Medium chain acyl CoA dehydrogenase deficiency (#201,450)	C6 > 0.11 μmol/L, C8 > 0.2 μmol/L, C8/C2 >= 0.01,	C8 > 0.3 μmol/L
	(C4DC+C5OH)/C8 <= 1
Very long chain acyl CoA dehydrogenase deficiency (#201,475)	C14:1 > 0.35 μmol/L, C14:1/C16 > 0.1, C14:1/C2 >= 0.02	C14:1 > 0.5 μmol/L
Long chain 3-hydroxy acyl-CoA dehydrogenase deficiency (#609,016), trifunctional protein deficiency (#609,015)	C16OH > 0.06 μmol/L, C16OH/C16 >= 0.02,
	C18:1OH > 0.04 μmol/L, C18OH > 0.03 μmol/L
Primary carnitine deficiency (#212,140)	C0 < 8.5 μmol/L	C0 < 9.0 μmol/L,
		(C0+C2+C3+C16+C18:1+C18)/CIT <= 1.3
Carnitine palmitoyltransferase I deficiency (#255,120)	C0/(C16+C18) > 30, C0 > 50 μmol/L,	C0 > 100 μmol/L
	(C16+C18:1)/C2 < 0.12
Carnitine palmitoyltransferase II deficiency (#255,110, #608,836, #600,649), Carnitine/acylcarnitine translocase deficiency (#212,138)	(C16+C18:1)/C2 > 0.55, C16 > 6.86 μmol/L,
	C0/(C16+C18) <= 1.8
Short chain acyl CoA dehydrogenase deficiency (#201,470)	C4 > 0.5 μmol/L,C4/C2 > 0.04	C4 > 0.8 μmol/L
Hyperprolinuria (#239,500)	PRO > 340 μmol/L
Nonketotic hyperglycinemia (#617, 301, #605,899)	GLY > 1000 μmol/L
Isobutyryl-CoA dehydrogenase deficiency (#611,283), ethylmalonic encephalopathy (#602,473)	C4/C3 > 0.45, C4/C2 > 0.04	C4 > 0.8 μmol/L

## Sheet: Screening data
Year	Number of screenings	Suspected positive number	Actual recall number	Recall rate	Confirmed number	Frequency
2016	39602	435	348	0.8	8	1: 4,950
2017	66399	839	671	0.7998	13	1: 5,107
2018	66037	657	598	0.9102	16	1: 4,127
2019	69372	1444	1302	0.9016	14	1: 4,955
2020	59439	1548	1396	0.9018	20	1: 2,971
Total	300849	4923	4315	0.8765	71	1: 4,237

## Sheet: Disorders
Disorders (OMIM codes)	Confirmed cases	Frequency
Amino acid metabolic disorders	28	1:10,745
Phenylalanine hydroxylase deficiency (#261,600)	16	1:18,803
Tetrahydrobiopterin deficiency (#233,910, #261,640, #612,716, #264,070, and #261,630)	2	1:150,425
Citrullinemia type Ⅰ (#215,700)	2	1:150,425
Citrin deficiency (#605,814 and #603,471)	5	1:60,170
Hypermethioninemia (#250,850)	2	1:150,425
Tyrosinemia type Ⅲ (#276,710)	1	1:300,849
Organic acid metabolic disorders	12	1:25,071
Isovaleric acidemia (#243,500)	2	1:150,425
Glutaric acidemia type Ⅰ (#231,670)	1	1:300,849
Propionic acidemia (#606,054)	3	1:100,283
2-methylbutryl CoA dehydrogenase deficiency (#611,283)	3	1:100,283
3-methylcrotonyl CoA carboxylase deficiency #(210,200 and #210,210)	3	1:100,283
Fatty acid oxidation disorders	31	1:9,705
Primary carnitine deficiency (#212,140)	22	1:13,675
Short chain acyl CoA dehydrogenase deficiency (#201,470)	7	1:42,978
Very long chain acyl CoA dehydrogenase deficiency (#609,016)	1	1:300,849
Multiple acyl CoA dehydrogenase deficiency (#231,680)	1	1:300,849
Total	71	1:4,237

## Sheet: AAMDs
No.	Gender	Confirmed age (day)	Abnormal level (μmol/L)	Reference range (μmol/L)	Affected gene	Allele 1		Allele 2
						Nucleotide variant	Amino acid variant	Nucleotide variant	Amino acid variant
1	M	47	Phe: 444.79	23-100	PTS(612,719)	c.84-291A>G	-	c.286G>A	p.D96N
2	M	41	Phe: 245.11	23-100		c.4A>C	p.S2R	c.259C>T	p.P87S
3	M	30	Phe: 105.43	23-100	PAH(612,349)	c.611A>G	p.Y204C	c.158G>A	p.R53H
4	F	47	Phe: 132.91	23-100		c.728G>A	p.R243Q	c.158G>A	p.R53H
5	M	33	Phe: 218.86	23-100		c.721C>T	p.R241C	-	-
6	M	50	Phe: 745.62	23-100		c.208_210delTCT	p.S70del	c.353-6T>C	-
7	F	36	Phe: 562.35	23-100		c.1068C>A	p.Y356*	c.907del	p.S303Pfs*38
8	M	31	Phe: 502.76	23-100		c.611A>G	p.Y204C	c.728G>A	p.R243Q
9	F	30	Phe: 159.60	23-100		c.527G>A	p.R176Q	c.498C>G	p.Y166*
10	M	19	Phe: 135.63	23-100		c.1068C>A	p.Y356*	c.158G>A	p.R53H
11	F	34	Phe: 264.59	23-100		c.721C>T	p.R241C	c.284_286delTCA	p.I95del
12	F	27	Phe: 160.25	23-100		c.464G>A	p.R155H	c.331C>T	p.R111*
13	F	35	Met: 46.97	6.5-40	MAT1A(610,550)	c.755T>C	p.I252T	-
14	F	27	Met: 75.66	6.5-40		c.314A>T	p.N105I	c.386A>G	p.D129G
15	M	33	TYR: 447.22	30-250	HPD(609,695)	c.893A>C	p.Q298P	c.217T>C	p.S73P
16	F	54	CIT: 350.67	5.5-26	ASS1(603,470)	c.1087C>T	p.R363W	c.748C>T	p.L250F
17	M	77	CIT: 39.00	5.5-26		c.1087C>T	p.R363W	c.11A>G	p.K4R
18	F	21	CIT: 186.21	5.5-26	SLC25A13(603,859)	c.1048G>A	p.D350N	IVS16ins3kb	p.A584Vfs*2
19	M	25	CIT: 72.41	5.5-26		IVS16ins3kb	p.A584Vfs*2	c.852_855delTATG	p.M285Pfs*2
20	M	50	CIT: 92.49	5.5-26		c.852_855delTATG	p.M285Pfs*2	-
21	M	43	CIT: 40.68	5.5-26		c.852_855delTATG	p.M285Pfs*2	c.1638_1660dup23	p.A554Gfs*17
22	F	40	CIT: 25.83	5.5-26		c.852_855delTATG	p.M285Pfs*2	c.1750_1751ins3kb	-

## Sheet: OAMDs
No.	Gender	Confirmed age (day)	Abnormal level (μmol/L)	Reference range (μmol/L)	Affected gene	Allele 1		Allele 2
						Nucleotide variant	Amino acid variant	Nucleotide variant	Amino acid variant
1	M	23	C4DC+C5OH: 0.83	0.07-0.4	MCCC2(609,010)	c.730C>G	p.P244A	c.1144_1147inv	p.K382_K383delinsF*
2	M	30	C4DC+C5OH: 1.13	0.07-0.4		c.1103delG	p.G368Vfs*70	c.1550G>A	p.G517E
3	M	78	C4DC+C5OH: 3.5	0.07-0.4		c.1061C>T	p.T354l	c.1599T>A	p.D533E
4	M	31	C5: 0.43	0.03-0.3	ACADSB(610,006)	c.1165A>G	p.M389V	-
5	M	41	C5: 0.48	0.03-0.3		c.1165A>G	p.M389V	-
6	M	41	C5: 0.83	0.03-0.3		c.1165A>G	p.M389V	-
7	M	33	C3: 4.28	0.35-4	PCCA(232,000)	c.819+1G>A	-	c.1850T>C	p.L617P
8	F	16		0.03-0.25	GCDH(608,801)	c.532G>A	p.G178R	c.1244-2A>C	-
9	F	16	C5: 9.12	0.03-0.3	IVD(607,036)	c.158G>C	p.Arg53Pro	c.349G>A	p.Glu117Lys
10	F	34	C5: 1.41	0.03-0.3		c.631A>G	p.T211A	c.865G>A	p.G289R

## Sheet: FAODs
No.	Gender	Confirmed age (day)	Abnormal level (μmol/L)	Reference range (μmol/L)	Affected gene	Allele 1		Allele 2		Allele 3
						Nucleotide variant	Amino acid variant	Nucleotide variant	Amino acid variant	Nucleotide variant	Amino acid variant
1	M	35	C0: 5.15	9-50	SLC22A5(603,377)	c.1400C>G	p.S467C	c.428C>T	p.P143L
2	M	17	C0: 4.36	9-50		c.51C>G	p.F17L	-
3	M	19	C0: 4.23	9-50		c.760C>T	p.R254X	c.1400C>G	p.S467C
4	F	23	C0: 2.79	9-50		c.497+1G>T	-	-
5	F	36	C0: 6.13	9-50		c.1400C>G	p.S467C	-
6	F	23	C0: 5.24	9-50		c.51C>G	p.F17L	c.621G>T	p.Q207H
7	F	40	C0: 5.11	9-50		c.431T>C	p.L144P	c.1195C>T	p.R399W
8	M	28	C0: 5.19	9-50		c.51C>G	p.F17L	c.338G>A	p.C113Y
9	M	59	C0: 5.28	9-50		c.1195C>T	p.R399W	c.1400C>G	p.S467C
10	M	33	C0: 7.54	9-50		c.1400C>G	p.S467C	c.1196G>A	p.R399Q
11	M	154	C0: 4.39	9-50		c.51C>G	p.F17L	c.470C>T	P.S157F
12	M	31	C0: 1.94	9-50		c.338G>A	p.C113Y	-
13	F	22	C0: 2.47	9-50		c.1108G>A	p.G370R	c.51C>G	p.F17L
14	F	38	C0: 2.97	9-50		c.760C>T	p.R254X	-
15	M	51	C0: 5.18	9-50		c.51C>G	p.F17L	c.782_799del	p.V261_P266del
16	F	38	C0: 4.94	9-50		c.760C>T	p.R254X	c.845G>A	p.R282Q
17	F	46	C0: 6.72	9-50		c.1400C>G	p.S467C	-
18	F	23	C0: 3.52	9-50		c.760C>T	p.R254X	c.1400C>G	p.S467C
19	M	37	C0: 4.88	9-50		c.760C>T	p.R254X	c.1400C>G	p.S467C
20	M	25	C0: 3.08	9-50		c.51C>G	p.F17L	c.653-8T>A	-
21	M	56	C0: 4.99	9-50		c.51C>G	p.F17L	-
22	F	56	C0: 3.25	9-50		c.760C>T	p.R254X	-
23	F	31	C12: 0.66; C14:2.76;	C12: 0.02-0.35;	ACADVL(609,575)	c.621_622+9del	-	c.622+14del	-	c.1531C>T	p.R511W
			C18: 2.23	C14: 0.04-0.45; C18: 0.24-2
24	M	53	C5: 0.45	C5: 0.03-0.3; C5DC+C6OH)/(C3DC+C4OH:0.3-2	ETFB(130,410)	c.340_342del	p.Lys114del	c.253C>T	p.Arg85Ter	c.82G>A	p.Gly28Ser
			(C5DC+C6OH)/(C3DC+C4OH): 5.0
25	M	41	C4: 1.46	0.1-0.5	ACADS(606,885)	c.172C>T	p.R58*	c.286G>A	p.G96S
26	M	26	C4: 1.20	0.1-0.5		c.220C>T	p.P74S	c.413del	p.N138Mfs*36
27	M	38	C4: 1.41	0.1-0.5		c.1031A>G	p.E344G	-
28	M	49	C4: 1.83	0.1-0.5		c.413delA	p.N138Mfs*36	c.758T>G	p.V253G
29	M	59	C4: 0.91	0.1-0.5		c.1130C>T	p.P377L	c.578C>T	p.S193L
30	M	30	C4: 1.75	0.1-0.5		c.795+1G>A	-	c.1031A>G	p.E344G
31	F	140	C4: 1.61	0.1-0.5		c.578>T	p.S193L	c.1031A>G	p.E344G

## Sheet: Eight cases without genetic dia
No.	Gender	Confirmed age (day)	Abnormal level (μmol/L)	Analysis of urinary pterin (mmol/mol Cre)	DHPR activity (nmol/min /mg Hb)	Determination of organic acid in urine	Diagnosis
1	M	40	Phe: 701.03↑	N: 1.43; B: 0.38↓; B%: 21.00	1.17	-	HPA
2	M	60	Phe: 563.53↑	N: 1.46; B: 0.58↓; B%: 28.43	2.46	-	HPA
3	F	75	Phe: 498.89↑	N: 4.26; B: 0.61↓; B%: 12.53↓	1.9	-	HPA
4	M	42	Phe: 148.76↑	N: 4.01↑; B: 0.57; B%: 14.21↓	1.63	-	HPA
5	M	56	Phe: 269.3↑	N: 4.11↑; B: 0.47; B%: 10.26↓	2	-	HPA
6	F	50	Phe: 172.9↑	N: 1.51; B: 0.60; B%: 28.44	1.7	-	HPA
7	M	20	C3: 10.45↑	-	-	3-hydroxypropionic acid↑, alanyl glycine↑, methyl citric acid↑, methyl Crotonyl glycine↑	PA
8	M	-	C3: 17.89↑	-	-	oxalic acid↑, 3-hydroxypropionic acid↑, 3-hydroxybutyric acid↑, 3-hydroxyisovaleric acid↑, alanyl glycine, 5-oxo-proline↑, methyl citric acid↑, methyl Crotonyl glycine↑	PA

## Sheet: Follow-up
Disorders (OMIM code)	Follow-up
	Normal development and growth（case）	Developmental delay and intellectual disability(case)	Death(case)
Phenylalanine hydroxylase deficiency (#261,600)	16	0	0
Tetrahydrobiopterin deficiency (#233,910, #261,640, #612,716, #264,070, and #261,630)	2	0	0
Citrin deficiency (#605814 and #603,471)	5	0	0
Citrullinemia type Ⅰ (#215,700)	2	0	0
Hypermethioninemia (#250,850)	2	0	0
Tyrosinemia type Ⅲ (#276,700, #276,600, #276,710)	1	0	0
Isovaleric acidemia (#243,500)	2	0	0
Propionic acidemia (#606,054)	2	0	1
Glutaric acidemia type Ⅰ (#231,670)	1	0	0
2-methylbutryl CoA dehydrogenase deficiency (#611,283)	3	0	0
3-methylcrotonyl CoA carboxylase deficiency (#210,200 and #210,210)	3	0	0
Primary carnitine deficiency (#212,140)	22	0	0
Short chain acyl CoA dehydrogenase deficiency (#201,470)	7	0	0
Very long chain acyl CoA dehydrogenase deficiency (#609,016)	1	0	0
Multiple acyl CoA dehydrogenase deficiency (#231,680)	1	0	0
Total	70	0	1

## Sheet: Gene data
Disorders (OMIM number)	Gene (OMIM number)	Mutation alleles number	Transcript	Nucleotide variant	Amino acid variant	Pathogenic	relative frequency	Accounting for total mutations
Primary carnitine deficiency (#212,140)	SLC22A5 (*603,377)	37						0.3136
		9	NM_003060.4	C.1400C>G	p.S467C	P	0.2432	0.0763
		8		C.51C>G	p.F17L	VUS	0.2162	0.0678
		6		C.760C>T	p.R254X	P	0.1622	0.0508
		2		C.1195C>T	p.R399W	P	0.0541	0.0169
		2		C.338G>A	p.C113Y	P	0.0541	0.0169
		1		C.1108G>A	p.G370R	VUS	0.027	0.0085
		1		C.1196G>A	p.R399Q	P	0.027	0.0085
		1		C.428C>T	p.P143L	LP	0.027	0.0085
		1		C.431T>C	p.L144P	VUS	0.027	0.0085
		1		C.470C>T	P.S157F	VUS	0.027	0.0085
		1		C.497+1G>T	/	P	0.027	0.0085
		1		C.621G>T	p.Q207H	LP	0.027	0.0085
		1		C.653-8T>A	/	VUS	0.027	0.0085
		1		C.782_799del	p.V261_P266del	VUS	0.027	0.0085
		1		C.845G>A	p.R282Q	P	0.027	0.0085
Hyperphenylalaninemia		24						0.2034
Phenylalanine hydroxylase deficiency	PAH (*612,349)	20					0.8333	0.1695
(#261,600)		3	NM_000277.3	C.158G>A	p.R53H	VUS	0.125	0.0254
		2		C.1068C>A	p.Y356*	P	0.0833	0.0169
		2		c.498C>G	p.Y166*	P	0.0833	0.0169
		2		C.611A>G	p.Y204C	LP	0.0833	0.0169
		2		C.721C>T	p.R241C	P	0.0833	0.0169
		2		C.728G>A	p.R243Q	P	0.0833	0.0169
		1		C.208_210delTCT	p.S70del	P	0.0417	0.0085
		1		C.284_286del	p.I95del	P	0.0417	0.0085
		1		C.331C>T	p.R111*	P	0.0417	0.0085
		1		C.353-6T>C	/	P	0.0417	0.0085
		1		C.464G>A	p.R155H	P	0.0417	0.0085
		1		C.527G>A	p.R176Q	LP	0.0417	0.0085
		1		C.907del(p.S303Pfs*38)	p.S303Pfs*38	P	0.0417	0.0085
Tetrahydrobiopterin deficiency (#233,910,	PTS (*612,719)	4					0.1667	0.0339
#261,640, #612,716,		1	NM_000317.3	C.4A>C	p.S2R	P	0.0417	0.0085
#264,070, and #261,630)		1		C.259C>T	p.P87S	P	0.0417	0.0085
		1		C.84-291A>G	/	P	0.0417	0.0085
		1		C.286G>A	p.D96N	P	0.0417	0.0085
Short chain acyl CoA dehydrogenase deficiency (#201,470)	ACADS (*606,885)	13						0.1102
		3	NM_000017.4	C.1031A>G	p.E344G	P	0.2308	0.0254
		2		C.578C>T	p.S193L	VUS	0.1538	0.0169
		2		C.413delA	p.N138Mfs*36	P	0.1538	0.0169
		1		C.1130C>T	p.P377L	LP	0.0769	0.0085
		1		C.795+1G>A	/	LP	0.0769	0.0085
		1		C.758T>G	p.V253G	US	0.0769	0.0085
		1		C.172C>T	p.R58*	LP	0.0769	0.0085
		1		C.286G>A	p.G96S	LP	0.0769	0.0085
		1		C.220C>T	p.P74S	LP	0.0769	0.0085
Citrin deficiency (#605,814	SLC25A13 (*603,859)	9						0.0763
and #603,471)		4	NM_014251.2	C.852_855delTATG	p.M285Pfs*2	P	0.4444	0.0339
		2		IVS16ins3kb	p.A584Vfs*2	P	0.2222	0.0169
		1		C.1048G>A	p.D350N	VUS	0.1111	0.0085
		1		C.1638_1660dup23(p.A554Gfs*17)	p.A554Gfs*17	P	0.1111	0.0085
		1		C.1750_1751ins3kb	/	P	0.1111	0.0085
3-methylcrotonyl CoA carboxylase deficiency (#210,200 and #210,210)	MCCC2 (*609,010)	6						0.0508
		1	NM_022132.4	C.1103delG	p.G368Vfs*70	LP	0.1667	0.0085
		1		C.1550G>A	p.G517E	VUS	0.1667	0.0085
		1		C.1061C>T	p.T354l	VUS	0.1667	0.0085
		1		C.1599T>A	p.D533E	VUS	0.1667	0.0085
		1		C.730C>G	p.P244A	VUS	0.1667	0.0085
		1		C.1144_1147inv	p.K382_K383delinsF*	P	0.1667	0.0085
Isovaleric acidemia (#243,500)	IVD (*607,036)	5						0.0424
		1	NM_002225.5	C.158G>C	p.Arg53Pro	P	0.2	0.0085
		1		C.349G>A	p.Glu117Lys	VUS	0.2	0.0085
		1		c.214G>A	p.D72N	VUS	0.2	0.0085
		1		C.631A>G	p.T211A	LP	0.2	0.0085
		1		C.865G>A	p.G289R	LP	0.2	0.0085
Citrullinemia type I (#215,700)	ASS1 (*603,470)	4						0.0339
		2	NM_000050.4	C.1087C>T	p.R363W	P	0.5	0.0169
		1		C.748C>T	p.L250F	VUS	0.25	0.0085
		1		C.11A>G	p.K4R	VUS	0.25	0.0085
2-methylbutryl CoA dehydrogenase deficiency (#611,283)	ACADSB (*610,006)	3	NM_001609.3	C.1165A>G	p.M389V	P	1	0.0254
Very long chain acyl CoA 377 dehydrogenase deficiency (#609,016)	ACADVL (*609,575)	3						0.0254
		1	NM_00001 8.4	C.621_622+9del	/	P	0.3333	0.0085
		1		c.622+14del	/	VUS	0.3333	0.0085
		1		c.1531C>T	p.R511W	LP	0.3333	0.0085
Multiple acyl-CoA dehydrogenase deficiency (#231,680)	ETFB (*130,410)	3						0.0254
		1	NM_001985.2	C.340_342del	p.Lys114del	VUS	0.3333	0.0085
		1		c.253C>T	p.Arg85Ter	P	0.3333	0.0085
		1		c.82G>A	p.Gly28Ser	VUS	0.3333	0.0085
Hypermethioninemia (#250,850)	MAT1A (*610,550)	3						0.0254
		1	NM_000429.3	C.755T>C	p.I252T	LP	0.3333	0.0085
		1		C.314A>T	p.N105I	VUS	0.3333	0.0085
		1		C.386A>G	p.D129G	VUS	0.3333	0.0085
Glutaric acidemia type Ⅰ (#231,670)	GCDH (*608,801)	2						0.0169
		1	NM_000159.3	C.532G>A	p.G178R	P	0.5	0.0085
		1		C.1244-2A>C	/	P	0.5	0.0085
Propionic acidemia (#606,054)	PCCA (*232,000)	2						0.0169
		1	NM_00028 2.4	C.819+1G>A	/	LP	0.5	0.0085
		1		C.1850T>C	p.L617P	VUS	0.5	0.0085
Tyrosinemia type Ⅲ (#276,710)	HPD (*609,695)	2						0.0169
		1	NM_002150.2	C.893A>C	p.Q298P	VUS	0.5	0.0085
		1		C.217T>C	p.S73P	VUS	0.5	0.0085
3-methylglutaconyl CoA hydratase deficiency (#614,739)	SERAC1 (*614,725)	1	NM_03286 1.3	C.1364C>G	p.T455S	VUS	1	0.0085
Nonketotic hyperglycinemia ( #605,899)	GLDC (*238,300)	1	NM_000170.2	C.2405C_T	p.A802v	P	1	0.0085
